# Supplementary material
Source: PubMed Central journal article supplement (PMC6262226)

## Supplementary Information

### Development of Reactive Pd/Fe Bimetallic Nanotubes for Dechlorination Reactions

*Elsayed M. Zahran,<sup>‡</sup> Dibakar Bhattacharyya,<sup>⊥</sup> Leonidas G. Bachas<sup>‡,§,\*</sup>*

<sup>‡</sup> Department of Chemistry, University of Kentucky, Lexington, KY, 40506

<sup>⊥</sup> Department of Chemical and Material Engineering, University of Kentucky, Lexington,  
KY, 40506

<sup>§</sup> Department of Chemistry, University of Miami, Coral Gables, FL, 33146

\* Corresponding author: (e-mail) [bachas@miami.edu](mailto:bachas@miami.edu); (Phone) +1(305) 284-4021; (Fax)  
+1(305) 284-5637

Department of Chemistry, University of Miami, Coral Gables, FL, 33146, USA

Figure S1. Photographic image of the U-shape reaction tube.

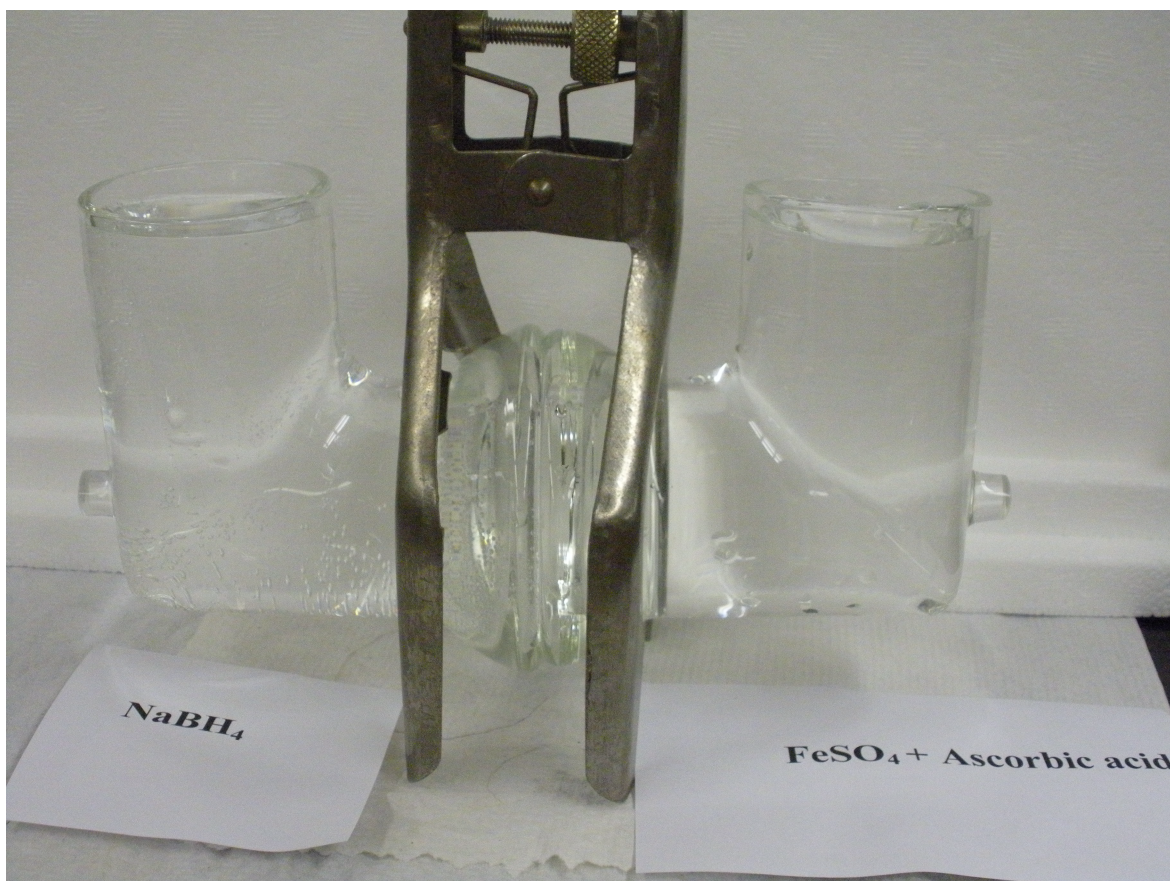

Figure S2. High magnification TEM image showing the surface details of 200 nm Fe nanotubes.

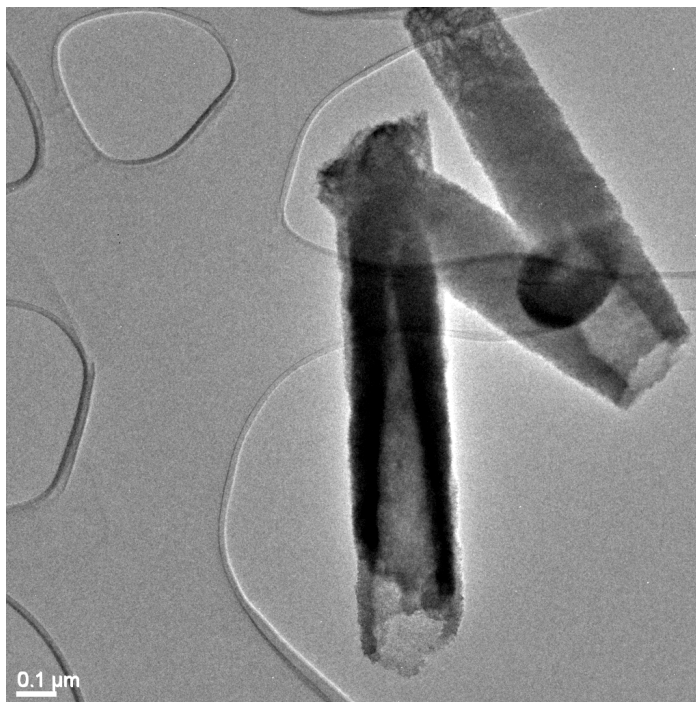

Figure S3. HRTEM image showing organized amorphous structure of Fe nanotubes prepared using 0.5 M FeSO<sub>4</sub> and 1 M NaBH<sub>4</sub>.

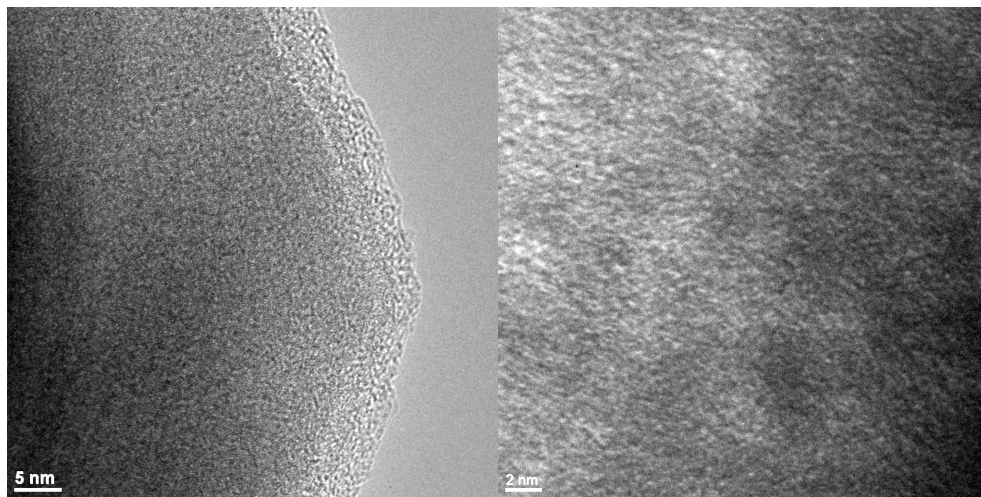

Figure S4. Analysis of the SAED pattern using CHT script on Digital micrograph.

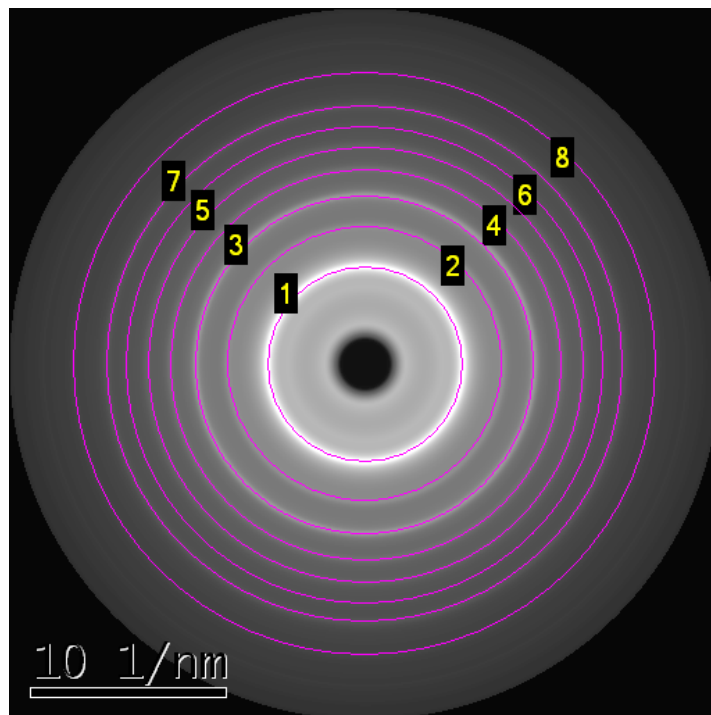

Figure S5. Low magnification TEM images and SEM images showing the aggregation of the as-prepared Pd/Fe nanotubes

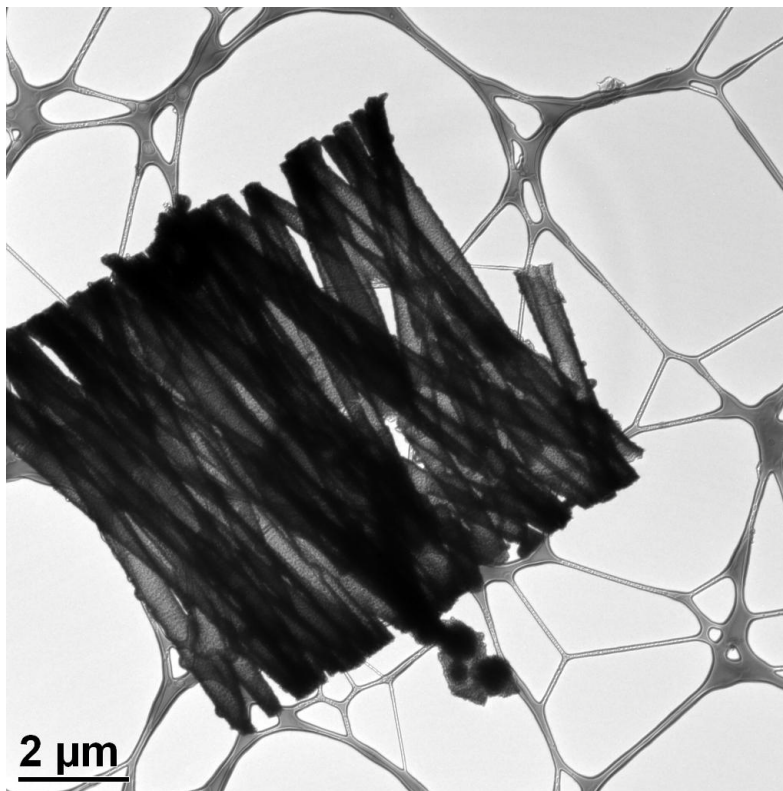

Figure S6. TEM images of Pd/Fe nanoparticles

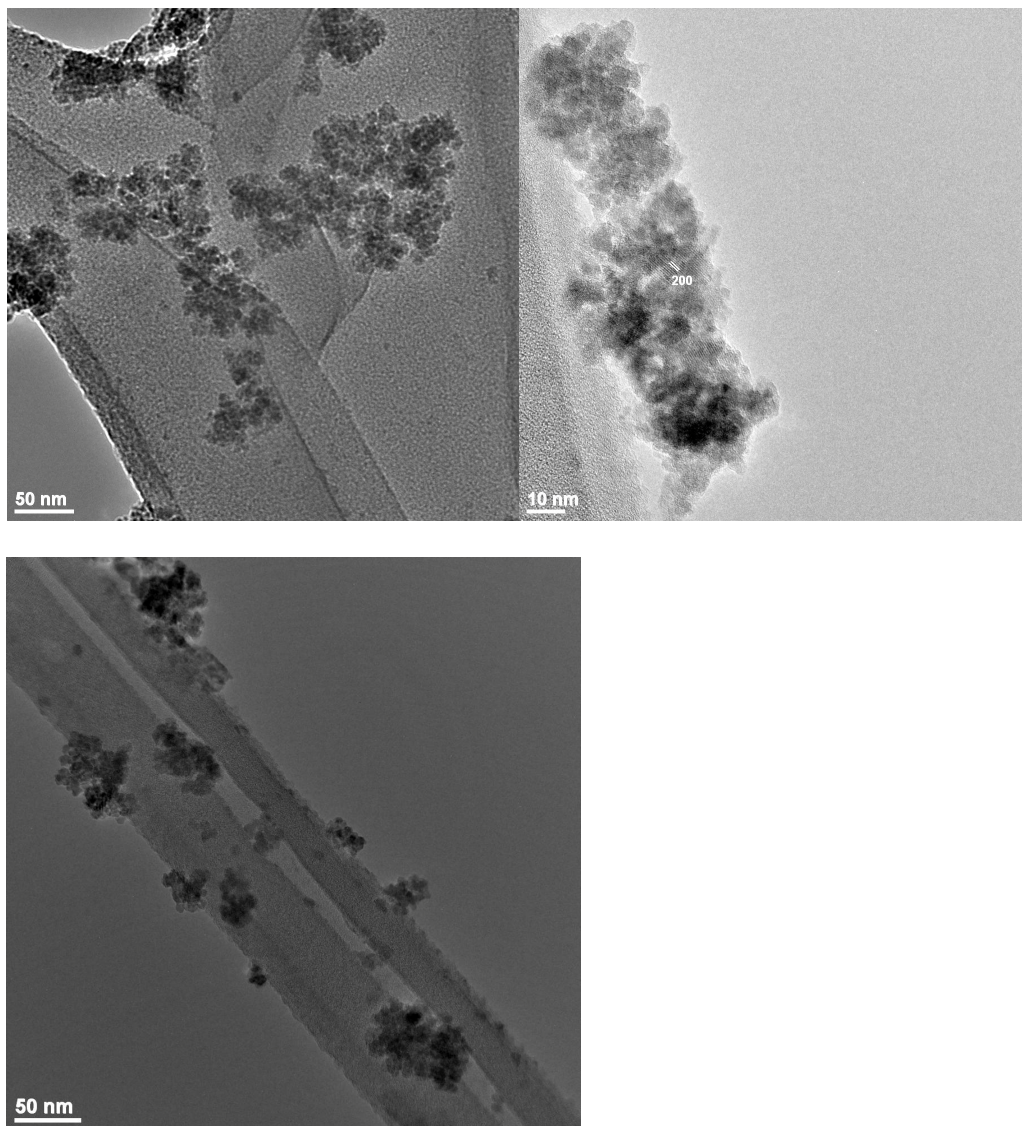

Figure S7. XRD spectrum of Pd/Fe nanoparticles prepared in presence of ascorbic acid and dried under inert condition.

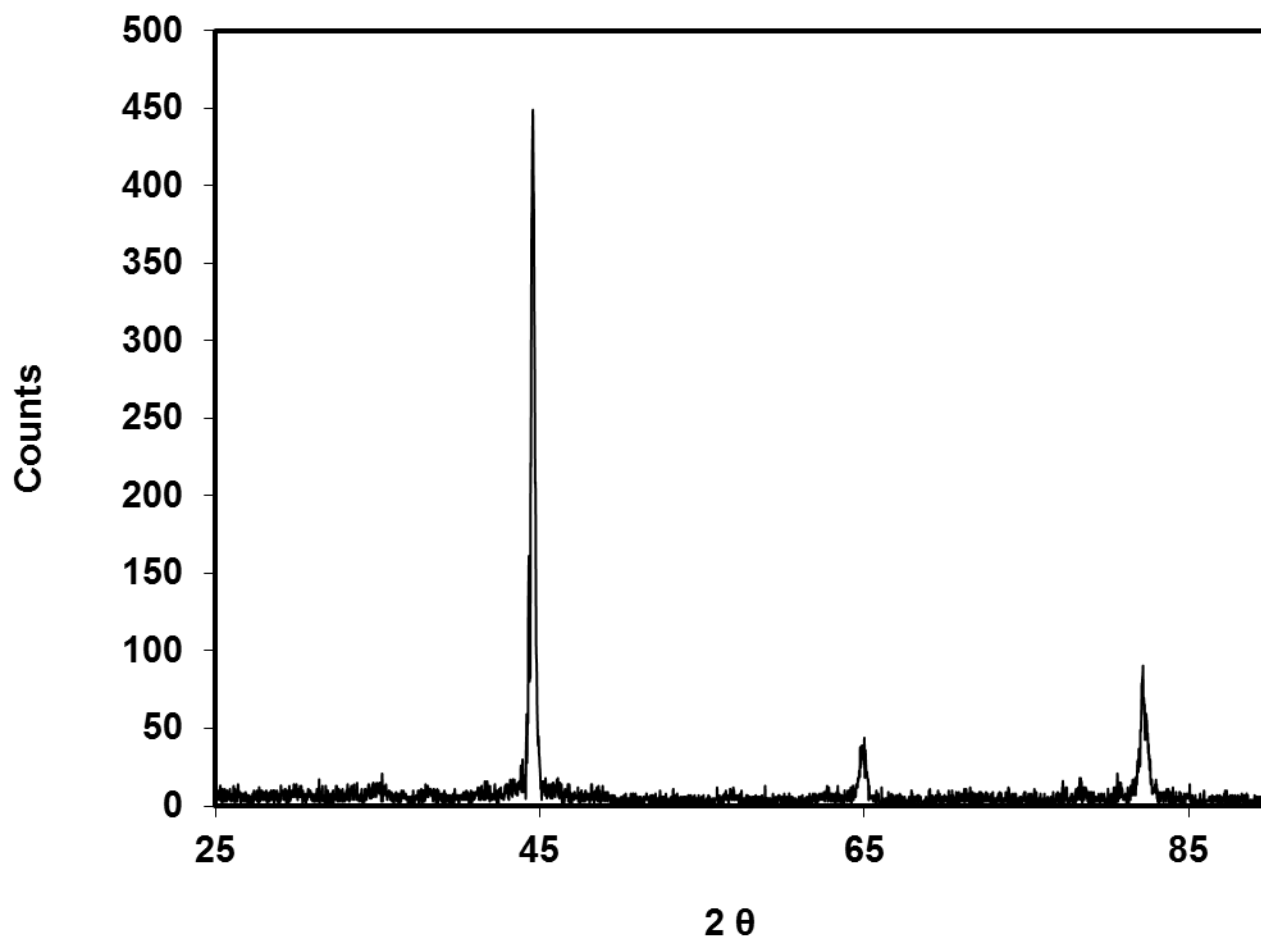

Supplement: NIHMS997116-supplement-SI.pdf [file NIHMS997116-supplement-SI.pdf]
